# Supplementary material for: Acetylsalicylic Acid (ASA) on Hydroxyethylcellulose/Polyacrylamide Gel (HEC/PAAm) as a Proposal for a Dermatological Compress: Mathematical Modeling of ASA Release Kinetics
Source: Hindawi journal article supplement (doi:10.1155/2019/4597641), 2019-01-20
Supplement: f1 [file 4597641.f1.pdf]

# Acetylsalicylic acid (ASA) on Hydroxyethylcellulose/Polyacrylamide gel (HEC/PAAm) as a proposal for a dermatological compress.

## Mathematical modeling of ASA release kinetics.

### Supplementary data

Simulation in Matlab to obtain the adjustment curve, error, and coefficients of the experimental data from the ASA released in solution Ethanol Water and Buffer

#### Ethanol and water

```
x=[15;30;45;60;120;180;240;300;360;420;480];
y=[0.0949;0.1547;0.2042;0.2451;0.2976;0.3312;0.3439;0.36;0.3719;0.3832;0.3941];
y1=[0.1091;0.1606;0.2034;0.2446;0.3003;0.3188;0.3258;0.33;0.3384;0.3499;0.3621];
y2=[0.0608;0.1004;0.1316;0.1568;0.1968;0.2105;0.2153;0.2193;0.2288;0.2427;0.2466];
n=length(y);
p=polyfit(log(x),log(y),1);
p1=polyfit(log(x),log(y1),1);
p2=polyfit(log(x),log(y2),1);
fprintf('exponent a= %2.5f\n',p(1));
fprintf('coefficient c = %3.5f\n', (exp(p(2))));
fprintf('exponent a1= %2.5f\n',p1(1));
fprintf('coefficient c1 = %3.5f\n', (exp(p1(2))));
fprintf('exponent a2= %2.5f\n',p2(1));
fprintf('coefficient c2 = %3.5f\n', (exp(p2(2))));
hold on
plot(x,y,'ro','markersize',4,'markerfacecolor','r')
plot(x,y1,'bo','markersize',4,'markerfacecolor','k')
plot(x,y2,'ko','markersize',4,'markerfacecolor','k')
z=@(x) (exp(p(2)))*x.^p(1);
z1=@(x) (exp(p1(2)))*x.^p1(1);
z2=@(x) (exp(p2(2)))*x.^p2(1);

fplot(z,[x(1),x(end)])
fplot(z1,[x(1),x(end)])
fplot(z2,[x(1),x(end)])
xlabel('t(min)')
ylabel('ASA released mg/mL')
grid on
title('Adjustment curve (Ethanol and H2O)')
plot(x,y,'r')
plot(x,y1,'b')
plot(x,y2,'k')
hold off

suma=0;
for i=1:n
```

```

        suma=suma+(y(i)-z(x(i)))^2; %Sum of deviation squared
    end

    suma1=0;
    for i=1:n
        suma1=suma1+(y1(i)-z1(x(i)))^2;
    end

    suma2=0;
    for i=1:n
        suma2=suma2+(y2(i)-z2(x(i)))^2;
    end

    desvrms=sqrt(suma); %Quadratic mean value
    desvrms1=sqrt(suma1);
    desvrms2=sqrt(suma2);

    error=desvrms/n
    error1=desvrms1/n
    error2=desvrms2/n

```

### **Buffer**

```

x=[15;30;45;60;120;180;240;300;360;420;480];
y=[0.1427;0.1938;0.2191;0.2349;0.2436;0.2513;0.2576;0.2597;0.2663;0.2683;
0.2697];
y1=[0.0427;0.073;0.1136;0.1335;0.1438;0.1517;0.1563;0.1582;0.1617;0.1645;
0.1657];
y2=[0.2224;0.2775;0.2913;0.2983;0.3048;0.3081;0.3113;0.3127;0.3133;0.3136
;0.3144];
n=length(y);
p=polyfit(log(x),log(y),1);
p1=polyfit(log(x),log(y1),1);
p2=polyfit(log(x),log(y2),1);
fprintf('exponent a= %2.5f\n',p(1));
fprintf('coefficient c = %3.5f\n', (exp(p(2))));
fprintf('exponent a1= %2.5f\n',p1(1));
fprintf('coefficient c1 = %3.5f\n', (exp(p1(2))));
fprintf('exponent a2= %2.5f\n',p2(1));
fprintf('coefficient c2 = %3.5f\n', (exp(p2(2))));
hold on
plot(x,y,'ro','markersize',4,'markerfacecolor','r')
plot(x,y1,'bo','markersize',4,'markerfacecolor','k')
plot(x,y2,'ko','markersize',4,'markerfacecolor','k')
z=@(x) (exp(p(2)))*x.^p(1);
z1=@(x) (exp(p1(2)))*x.^p1(1);
z2=@(x) (exp(p2(2)))*x.^p2(1);

fplot(z,[x(1),x(end)])
fplot(z1,[x(1),x(end)])
fplot(z2,[x(1),x(end)])
xlabel('t(min)')
ylabel('ASA released mg/mL')
grid on
title('Adjustment curve (Buffer)')

```

```

plot(x,y,'r')
plot(x,y1,'b')
plot(x,y2,'k')
hold off

suma=0;
for i=1:n
    suma=suma+(y(i)-z(x(i)))^2; %Sum of deviation squared
end

suma1=0;
for i=1:n
    suma1=suma1+(y1(i)-z1(x(i)))^2;
end

suma2=0;
for i=1:n
    suma2=suma2+(y2(i)-z2(x(i)))^2;
end

desvrms=sqrt(suma);% Quadratic mean value
desvrms1=sqrt(suma1);
desvrms2=sqrt(suma2);

error=desvrms/n
error1=desvrms1/n
error2=desvrms2/n

```
